# Supplementary material for: Cross-talk among MEN1, p53 and Notch regulates the proliferation of pancreatic neuroendocrine tumor cells by modulating INSM1 expression and subcellular localization
Source: PubMed Central journal article supplement — Neoplasia. 2021 Aug 2;23(9):979–92. doi: 10.1016/j.neo.2021.07.008 (PMC8350333; doi:10.1016/j.neo.2021.07.008), 2021-08-02

1 *Research Article*

2 **Cross-talk among *MEN1*, *p53* and Notch regulates the proliferation of**  
3 **pancreatic neuroendocrine tumor cells by modulating INSM1 expression**  
4 **and subcellular localization**

5

6 Ylenia Capodanno <sup>1</sup>, Yu Chen <sup>1</sup>, Joerg Schrader <sup>2</sup>, Mitsuhiro Tomosugi <sup>3</sup>, Shoiciro Sumi <sup>3</sup>,  
7 Akihiko Yokoyama <sup>4</sup>, Nobuyoshi Hiraoka <sup>5</sup>, Rieko Ohki <sup>1,\*</sup>.

8

9 <sup>1</sup>Laboratory of Fundamental Oncology, National Cancer Research Institute, Chuo-ku, 103-  
10 0045, Tokyo, Japan

11 <sup>2</sup> I. Medical Department, University Medical Center Hamburg-Eppendorf, Martinstrasse 52,  
12 20246, Hamburg, Germany

13 <sup>3</sup> Laboratory of Organ and Tissue Reconstruction, Institute for Frontier Life and Medical  
14 Sciences, Kyoto University, Sakyo-ku, 606-8507, Kyoto, Japan

15 <sup>4</sup> Tsuruoka Metabolomics Laboratory, National Cancer Center, Yamagata, 997-0052, Japan

16 <sup>5</sup> Division of Molecular pathology, National Cancer Research Institute, Chuo-ku, 103-0045,  
17 Tokyo, Japan

18

19 \*corresponding author

20 Laboratory of Fundamental Oncology, National Cancer Research Institute, 5-1-1 Tsukiji,  
21 Chuo-ku, 103-0045, Tokyo, Japan. Tel +81335475201 EXT.3813

22 rohki@ncc.go.jp

23

24

## 25 **Supplementary figures**

### 26 **Figure S1 INSM1 expression in PNET human tissues with different tumor grades and genomic** 27 **abnormalities.**

28 Representative images of immunohistochemical staining of INSM1 in grade 1 and 2 surgically resected  
29 PNET tumor tissues having no LOH, *PHLDA3* LOH or a *MEN1* LOH genomic profile.

30

### 31 **Figure S2 INSM1 localization and expression in multiple NET cell lines.**

32 Representative images of immunofluorescence analysis showing INSM1 expression and localization in  
33 multiple NET cell lines having either *p53* null (H1299), *p53* mutated (Bon1, QGP1) or *p53* wild-type  
34 (NT3) genotype.

35

### 36 **Figure S3 Notch receptors (*NOTCH1, 2, 3 and JAG1, 2*), Notch target genes (*HES1, HES5,* 37 *HES6, HEY1 and HEY2*) and Notch ligands (*DLL1, DLL3*) gene expression in *p53* wildtype 38 (NT3) compared to *p53* null (H1299) NET cells.**

39 Gene markers underlined in orange were selected for further analysis. Expression values were  
40 calculated using cDNA from H1299 (*p53* null) cells as the calibrator sample. Values are mean of  
41 triplicates +/- SD.

42

### 43 **Figure S4 Effect of GSI treatment on Notch target expression depends on *p53* status in PNET** 44 **cells.**

45 NT3 (*p53* wild-type) and Bon1 (*p53* mutated cells) were treated with 10 µg/ml GSI for 48 hours to  
46 force accumulation of cell surface Notch, then washed to re-initiate Notch signaling. Control samples  
47 were treated with DMSO. After 4 hours, RNA was isolated and cDNA was prepared for real-time PCR  
48 analysis of Notch receptors (*NOTCH1, 2, 3 and JAG1, 2*), Notch target genes (*HES1, HES5, HES6,*  
49 *HEY1 and HEY2*) and Notch ligands (*DLL1, DLL3*). Expression values were calculated using cDNA  
50 from DMSO-treated cells as the calibrator sample. Values are mean of triplicates +/- SD.

51

52

53

**TableS 1** Clinical and pathological features of PanNET samples used in this study.

| <b>GENOMIC STATUS</b> | <b>SEX/AGE</b> | <b>TUMOR TYPE</b> | <b>SPECIMENT SITE</b> | <b>WHO GRADE (NET)</b> |
|-----------------------|----------------|-------------------|-----------------------|------------------------|
| No LOH                | M/55           | NF PanNET         | Primary               | 1                      |
|                       | M/59           | NF PanNET         | Primary               | 2                      |
|                       | F/55           | NF PanNET         | Primary               | 2                      |
|                       | F/60           | NF PanNET         | Primary               | 3                      |
|                       | M/35           | NF PanNET         | Primary               | 3                      |
| <i>PHLDA3</i> LOH     | M/51           | NF PanNET         | Primary               | 1                      |
|                       | F/56           | NF PanNET         | Primary               | 2                      |
|                       | F/56           | NF PanNET         | Primary               | 2                      |
|                       | M/44           | NF PanNET         | Primary               | 3                      |
|                       | F/37           | NF PanNET         | Primary               | 3                      |
| <i>MEN1</i> LOH       | M/61           | NF PanNET         | Primary               | 1                      |
|                       | M/71           | NF PanNET         | Primary               | 2                      |
|                       | M/62           | NF PanNET         | Primary               | 2                      |
|                       | M/48           | NF PanNET         | Primary               | 3                      |
|                       | F/60           | NF PanNET         | Primary               | 3                      |

54

*NF PanNET*= Non-functional pancreatic neuroendocrine tumors; M= Male; F= Female.

55

56

57 **Table S2** Genomic status of NET cell lines.

58

| <b>STATUS</b>        | <b>H1299<br/>(LUNG NET)</b> | <b>BON1<br/>(PNET)</b>                                       | <b>QGP1 (PNET)</b>                                               | <b>NT3<br/>(PNET)</b>                    |
|----------------------|-----------------------------|--------------------------------------------------------------|------------------------------------------------------------------|------------------------------------------|
| <b><i>p53</i></b>    | Null                        | Mutated<br>(LOF, Homozygous<br>stop in exon 10)              | Mutated<br>(LOF, Homozygous<br>frameshift deletion in<br>exon 4) | Wild-type                                |
| <b><i>MEN1</i></b>   | Protein detected            | LOH and missense<br>mutation of the<br>remaining allele      | LOH and missense<br>mutation of the<br>remaining allele          | LOF (missense<br>homozygous<br>mutation) |
| <b><i>PHLDA3</i></b> | Not expressed               | LOH and potential<br>inactivation of the<br>remaining allele | No LOH                                                           | No LOH                                   |

59

60

61 **Table S3** Primer list

62

| <b>GENE<br/>SYMBOL</b> | <b>FORWARD PRIMERS</b>   | <b>REVERSE PRIMERS</b>    |
|------------------------|--------------------------|---------------------------|
| <i>MEN1</i>            | CAGGGGCCAGACAGTCAATG     | GGTGGGCTCCAGCTCCTCTA      |
| <i>P57</i>             | CGGCGATCAAGAAGCTGTCC     | CGGGCTCTTTGGGCTCT         |
| <i>P27</i>             | CAGCTTGCCCCGAGTTCTACT    | GCGTGTCTCAGAGTTAGCC       |
| <i>P38</i>             | GGAAGACCATGTGGACCTGT     | GGCGTTTGGAGTGGTAGAAA      |
| <i>CD133</i>           | TGGATGCAGAACTTGACAACGT   | ATACCTGCTACGACAGTCGTGGT   |
| <i>NOTCH1</i>          | CCGTCATCTCCGACTTCATCT    | GTGTCTCCTCCCTGTTGTTCTG    |
| <i>NOTCH2</i>          | GCTGATGCTGCCAAGCGT       | CCGGGAAGACGATCCAT         |
| <i>NOTCH3</i>          | CTGGCGAGACTGCTTTGC       | CGACTGTGCCGCTTTGAG        |
| <i>NOTCH4</i>          | TGCAGGCATATGGGATGTAA     | CATCCCCACAGTGGAGTTCT      |
| <i>HEY1</i>            | GCCGAGATCCTGCAGATGA      | GCTGGGAAGCGTAGTTGTTG      |
| <i>HEY2</i>            | AGGCTACTTTGACGCACACG     | CAAGTGCTGAGATGAGACACAAG   |
| <i>JAG1</i>            | CGGCCTCTGAAGAACAGAAC     | TCACCAAGCAACAGATCCAA      |
| <i>JAG2</i>            | AGGTGGAGACGGTTGTTACG     | ATTGATCTGGGTCATGCAGTTG    |
| <i>HES1</i>            | ACGTGCGAGGGCGTTAATAC     | ATTGATCTGGGTCATGCAGTTG    |
| <i>HES5</i>            | CTACCTGAAGCACAGCAAAGC    | GAAGTGGTACAGCAGCTTCATCT   |
| <i>HES6</i>            | AGCTGGAGAACGCCGAAGT      | ATGGACTCGAGCAGAGATGGTT    |
| <i>DLL1</i>            | ATGTGATGAGCAGCATGGATT    | GGTGTGTGCAGTAGTTCAGGTC    |
| <i>DLL2</i>            | TGAGCATGGCTTCTGTGAAC     | AAAGGACCTGGGTGTCTCACTAC   |
| <i>CCND1</i>           | GTCCATGCGGAAGATCGTC      | GCGGTCCAGGTAGTTCATG       |
| <i>GADPH</i>           | CAAGATCATCAGCAATGCCT     | CAGGGATGATGTTCTGGAGAG     |
| <i>P53</i>             | GGAACTCAAGGATGCCCAGG     | ATGGCGGAGGTAGACTGAC       |
| <i>PHLDA3</i>          | GTCCATGCCTTCCACCTT       | ACCATCTTTCCTTCATGCTACC    |
| <i>MDM2</i>            | AGGGAGATATGTTGTGAAGAAGCA | GATCCAACCAATCACCTGAATGTTT |
| <i>INSM1</i>           | AACTGTCCTTCGCTTGA        | ACGAGACAAACGCGTACAGCT     |
| <i>FOXA2</i>           | GGAGCAGCTACTACTATGCAGAGC | CGTGTTTCATGCCGTTTCATCC    |

63

**Figure S1**

Capodanno et al.

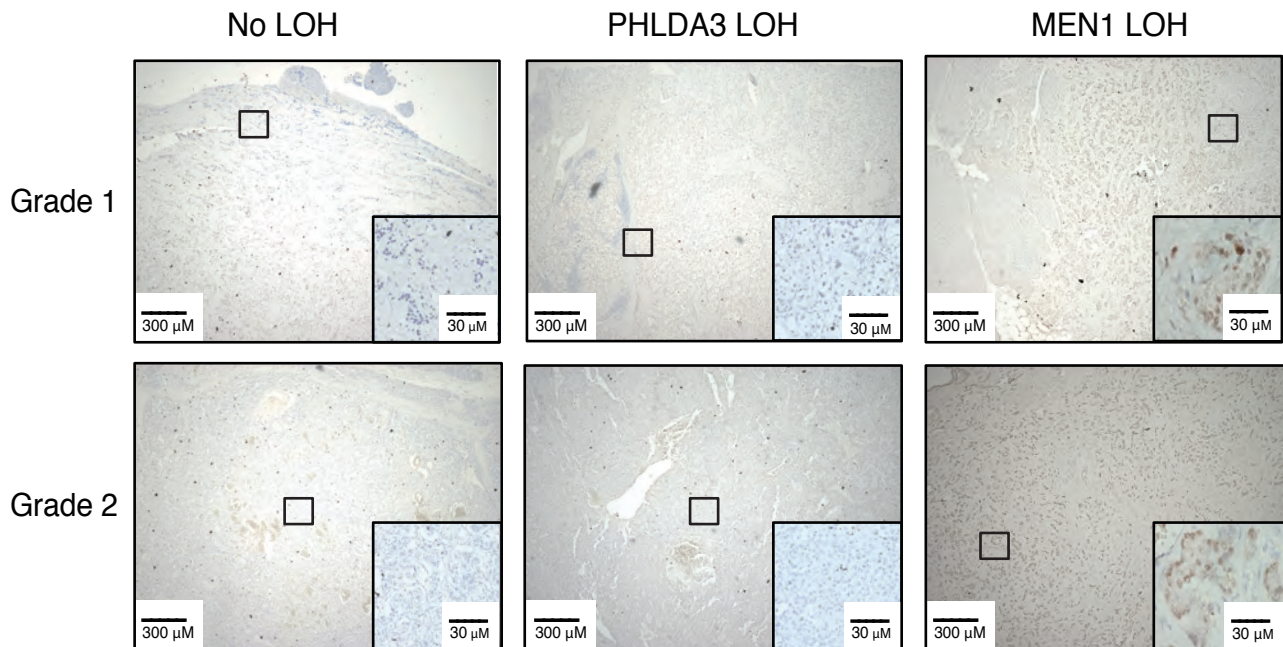

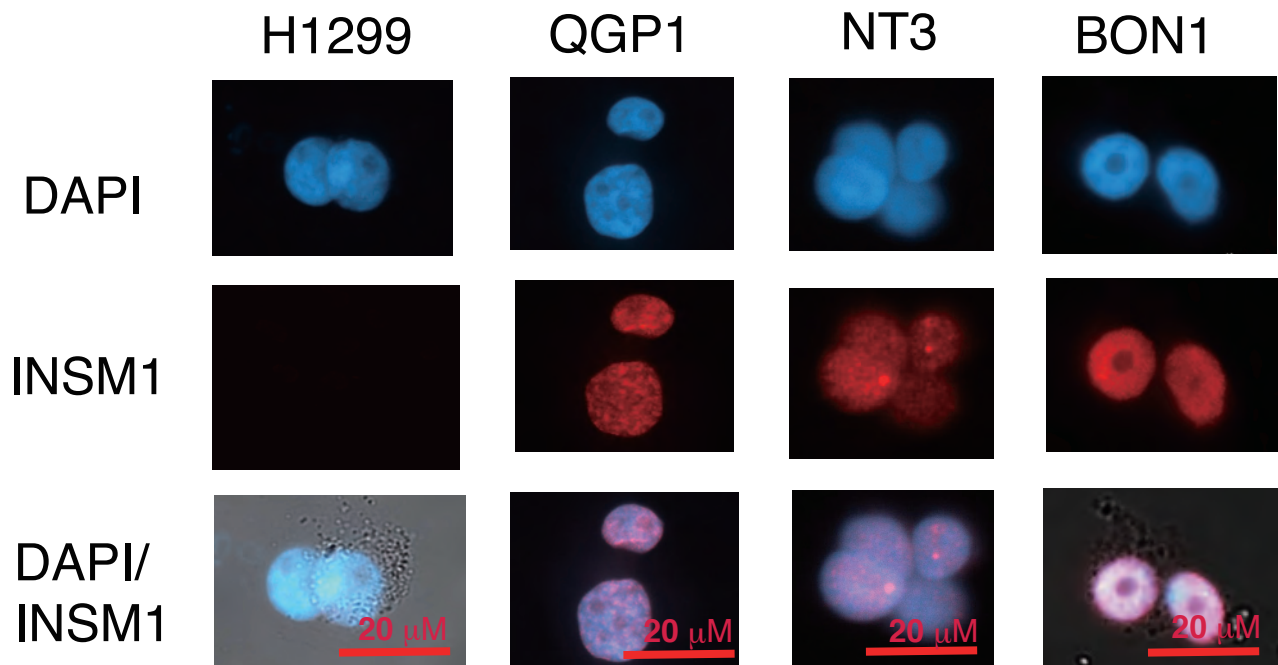

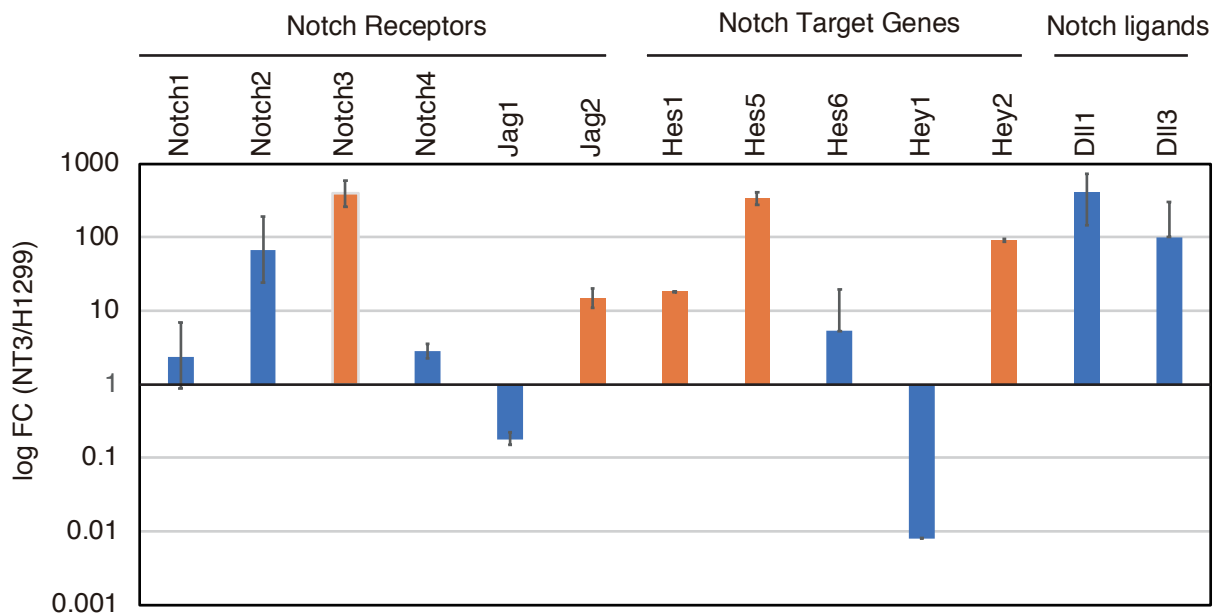



Figure S4

Capodanno et al.

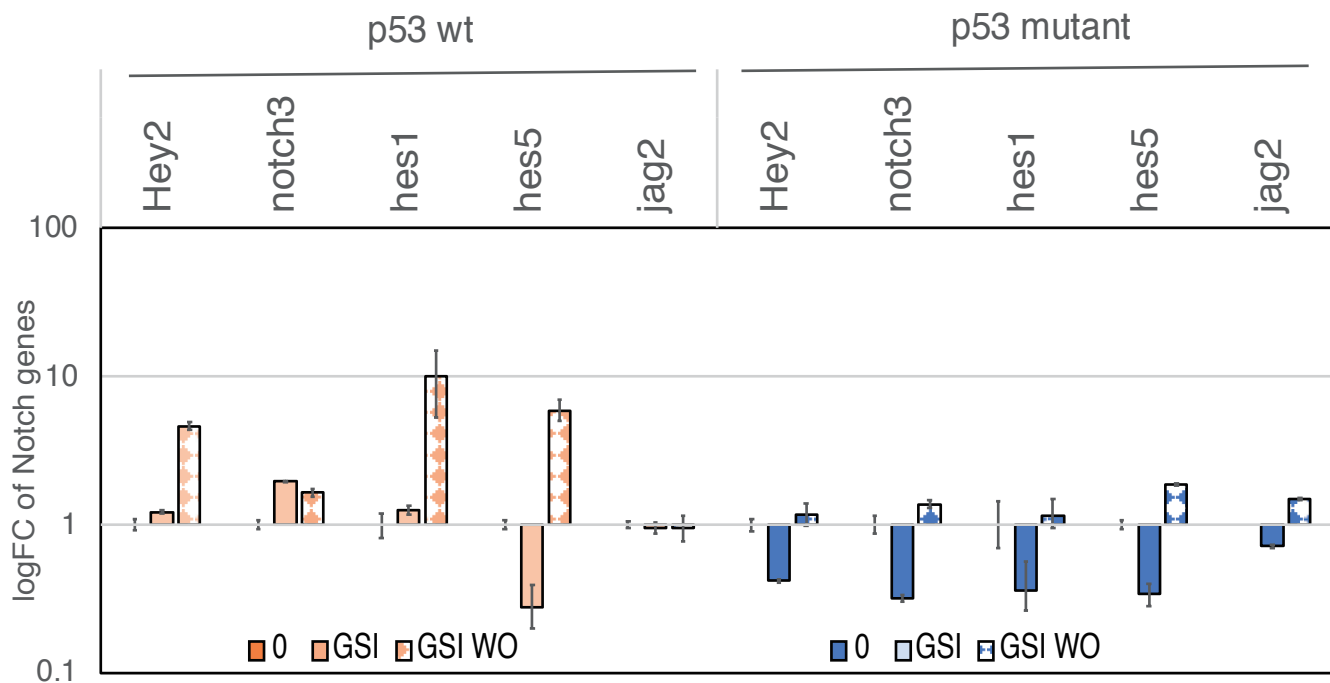

Supplement: mmc1.pdf [file mmc1.pdf]
